# Supplementary material for: Microencapsulation ofCitrus aurantifoliaessential oil with the optimized CaCl2crosslinker and its antibacterial study for cosmetic textiles
Source: Royal Society of Chemistry journal article supplement (doi:10.1039/d2ra04053k), 2022-01-01
Supplement: d2ra04053k1.pdf [file d2ra04053k1.pdf]

## Electronic Supplementary Information

### Microencapsulation of *Citrus aurantifolia* Essential Oil with Optimized CaCl<sub>2</sub> Crosslinker and Their Antibacterial Study for Cosmetic Textile

Luthfia Pratiwi,<sup>a</sup> Diana Rakhmawaty Eddy,<sup>a</sup> Jamaludin Al Anshori,<sup>a</sup> Asep Harja,<sup>b</sup> Tatang Wahyudi,<sup>c</sup> Agus Surya Mulyawan,<sup>c</sup> and Euis Juliaeha\*<sup>a</sup>

<sup>a</sup>Department of Chemistry, Faculty of Mathematics and Natural Sciences, Universitas Padjadjaran, Jl. Raya Bandung-Sumedang km.21, Jatinangor, Sumedang, West Java, Indonesia, 45363

E-mail: euis.julaeha@unpad.ac.id

<sup>b</sup>Department of Geophysics, Faculty of Mathematics and Natural Sciences, Universitas Padjadjaran, Jl. Raya Bandung-Sumedang km.21, Jatinangor, Sumedang, West Java, Indonesia, 45363

<sup>c</sup>Center for Textile, Bandung, Indonesia, Jl. Jendral Ahmad Yani No.390, Bandung, West Java, Indonesia 40272

#### Table of contents

|                                                                                                                                      |   |
|--------------------------------------------------------------------------------------------------------------------------------------|---|
| <b>Table ESI 1</b> Chemical compositions of LOs based on GC-MS analysis .....                                                        | 2 |
| <b>Fig. ESI 1</b> PSA spectra of LOs microcapsules crosslinked with various amounts of CaCl <sub>2</sub> .....                       | 3 |
| <b>Fig. ESI 2</b> Avrami's kinetic model of LOs release out of microcapsules crosslinked with 10% of CaCl <sub>2</sub> .....         | 3 |
| <b>Fig. ESI 3</b> Avrami's kinetic model of LOs release out of microcapsules crosslinked with 15% of CaCl <sub>2</sub> .....         | 4 |
| <b>Fig. ESI 4</b> Avrami's kinetic model of LOs release out of microcapsules crosslinked with 20% of CaCl <sub>2</sub> .....         | 4 |
| <b>Fig. ESI 5</b> Avrami's kinetic model of LOs release out of microcapsules crosslinked with 25% of CaCl <sub>2</sub> .....         | 5 |
| <b>Fig. ESI 6</b> Avrami's kinetic model of LOs release out of microcapsules crosslinked with 30% of CaCl <sub>2</sub> .....         | 5 |
| <b>Fig. ESI 7</b> Avrami's kinetic model of LOs release out of microcapsules crosslinked with 15% of CaCl <sub>2</sub> at 30°C.....  | 6 |
| <b>Fig. ESI 8</b> Avrami's kinetic model of LOs release out of microcapsules crosslinked with 15% of CaCl <sub>2</sub> at 40°C.....  | 6 |
| <b>Fig. ESI 9</b> Avrami's kinetic model of LOs release out of microcapsules crosslinked with 15% of CaCl <sub>2</sub> at 50°C.....  | 7 |
| <b>Fig. ESI 10</b> Avrami's kinetic model of LOs release out of microcapsules crosslinked with 15% of CaCl <sub>2</sub> at 60°C..... | 7 |

**Table ESI 1** Chemical compositions of LOs based on GC-MS analysis

| No.        | tr (min)      | Area (%)     | Compound                                                                                                                   | Similarity Quality |
|------------|---------------|--------------|----------------------------------------------------------------------------------------------------------------------------|--------------------|
| 1.         | 6.068         | 0.61         | (1R)-2,6,6-Trimethylbicyclo[3.1.1]hept-2-ene                                                                               | 94                 |
| <b>2.</b>  | <b>7.962</b>  | <b>14.60</b> | <b><math>\beta</math>-pinen</b>                                                                                            | <b>94</b>          |
| <b>3.</b>  | <b>9.999</b>  | <b>22.22</b> | <b>D-Limonene</b>                                                                                                          | <b>99</b>          |
| 4.         | 10.480        | 0.52         | p-Cymene                                                                                                                   | 95                 |
| 5.         | 11.264        | 0.42         | gamma.-Terpinene                                                                                                           | 93                 |
| 6.         | 13.335        | 1.04         | 3-Carene                                                                                                                   | 95                 |
| 7.         | 16.036        | 0.52         | Carveol                                                                                                                    | 45                 |
| 8.         | 16.184        | 0.49         | Cyclohexene, 5-methyl-3-(1-methyle thenyl)-, trans-(-)-                                                                    | 90                 |
| 9.         | 16.923        | 0.97         | 1,4-Cyclohexadiene, 3-ethenyl-1,2- dimethyl-                                                                               | 64                 |
| 10.        | 17.260        | 2.68         | .gamma.-Terpinene                                                                                                          | 93                 |
| 11.        | 17.775        | 1.23         | Verbenol                                                                                                                   | 49                 |
| 12.        | 17.993        | 0.76         | Decanal                                                                                                                    | 83                 |
| 13.        | 18.204        | 2.36         | Cyclohexene, 1-methyl-5-(1-methyle thenyl)-, (R)-                                                                          | 90                 |
| 14.        | 19.085        | 0.88         | 3-Carene                                                                                                                   | 90                 |
| 15.        | 20.327        | 1.34         | 3-Carene                                                                                                                   | 95                 |
| <b>16.</b> | <b>20.796</b> | <b>14.21</b> | <b>2,6-Dimethyl-1,3,5,7-octatetraene,E,E-</b>                                                                              | <b>76</b>          |
| <b>17.</b> | <b>22.147</b> | <b>18.23</b> | <b>Citral</b>                                                                                                              | <b>95</b>          |
| 18.        | 23.177        | 0.42         | 1-Cyclohexene-1-carboxaldehyde, 4- (1-methylethenyl)-                                                                      | 91                 |
| 19.        | 23.921        | 0.90         | Cyclohexane, 1-ethenyl-1-methyl-2, 4-bis(1-methylethenyl)-, [1S-(1.alpha.,2.beta.,4.beta.)]-                               | 99                 |
| 20.        | 24.292        | 0.97         | .gamma.-Terpinene                                                                                                          | 97                 |
| 21.        | 25.071        | 1.69         | Bicyclo[3.1.1]hept-2-ene, 2,6-dimethyl-6-(4-methyl-3-pentenyl)-                                                            | 98                 |
| 22.        | 25.219        | 4.49         | 3-Carene                                                                                                                   | 96                 |
| 23.        | 25.609        | 1.40         | 1,5-Cyclodecadiene, 1,5-dimethyl-8 -(1-methylethylidene)-, (E,E)-                                                          | 98                 |
| 24.        | 26.770        | 0.26         | 1,4,7,-Cycloundecatriene, 1,5,9,9- tetramethyl-, Z,Z,Z                                                                     | 97                 |
| 25.        | 28.412        | 4.61         | .beta.-Bisabolene                                                                                                          | 97                 |
| 26.        | 31.153        | 0.30         | 1H-Cycloprop[e]azulene, 1a,2,3,4,4 a,5,6,7b-octahydro-1,1,4,7-tetramethyl-, [1aR-(1a.alpha.,4.alpha.,4a.beta.,7b.alpha.)]- | 98                 |
| 27.        | 33.144        | 1.46         | Neoisolongifolene, 8,9-dehydro-                                                                                            | 90                 |
| 28.        | 34.987        | 0.50         | Cycloisolongifolene, 8,9-dehydro-                                                                                          | 90                 |
| 29.        | 35.685        | 0.50         | Naphthalene, 1,2,3,5,6,8a-hexahydro-4,7-dimethyl-1-(1-methylethyl)-, (1S-cis)-                                             | 86                 |
| 30.        | 36.446        | 0.83         | .beta.-Bisabolene                                                                                                          | 70                 |

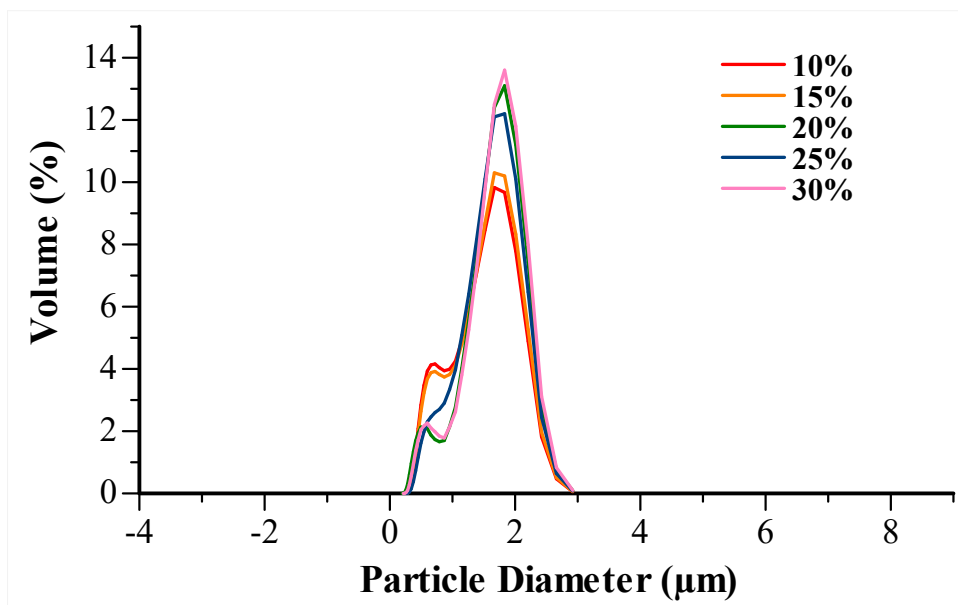

Fig. ESI 1 PSA spectra of LOs microcapsules crosslinked with various amounts of  $\text{CaCl}_2$

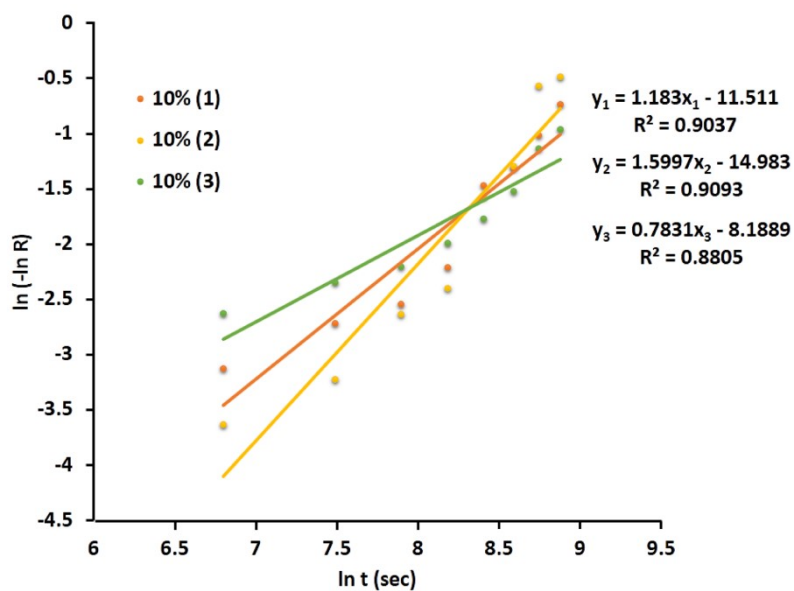

Fig. ESI 2 Avrami's kinetic model of LOs release out of microcapsules crosslinked with 10% of  $\text{CaCl}_2$

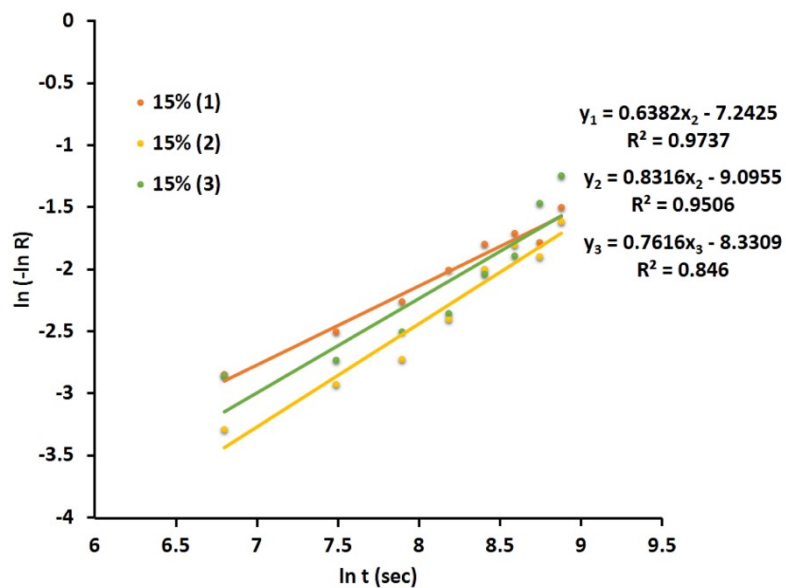

**Fig. ESI 3** Avrami's kinetic model of LOs release out of microcapsules crosslinked with 15% of  $\text{CaCl}_2$

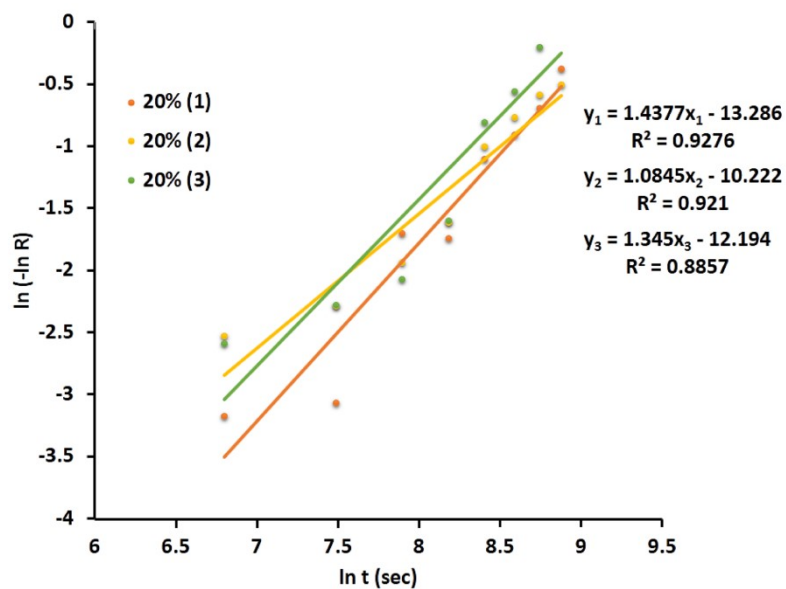

**Fig. ESI 4** Avrami's kinetic model of LOs release out of microcapsules crosslinked with 20% of  $\text{CaCl}_2$

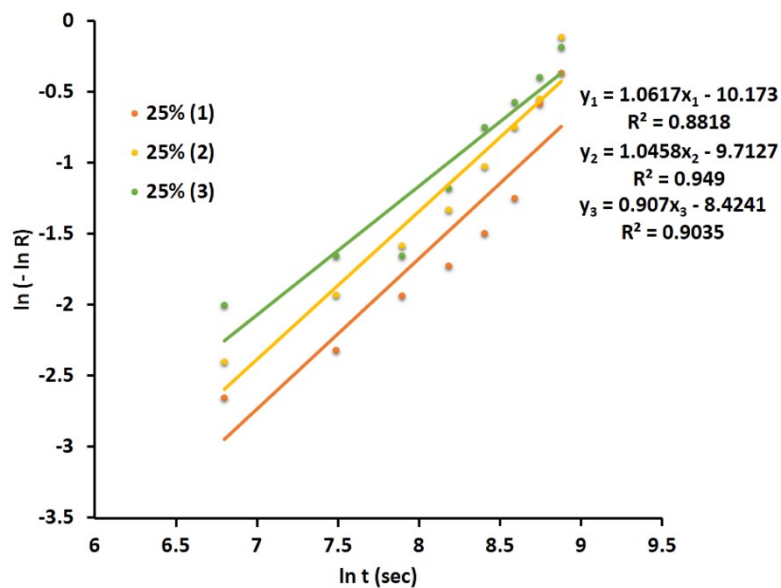

Fig. ESI 5 Avrami's kinetic model of LOs release out of microcapsules crosslinked with 25% of  $\text{CaCl}_2$

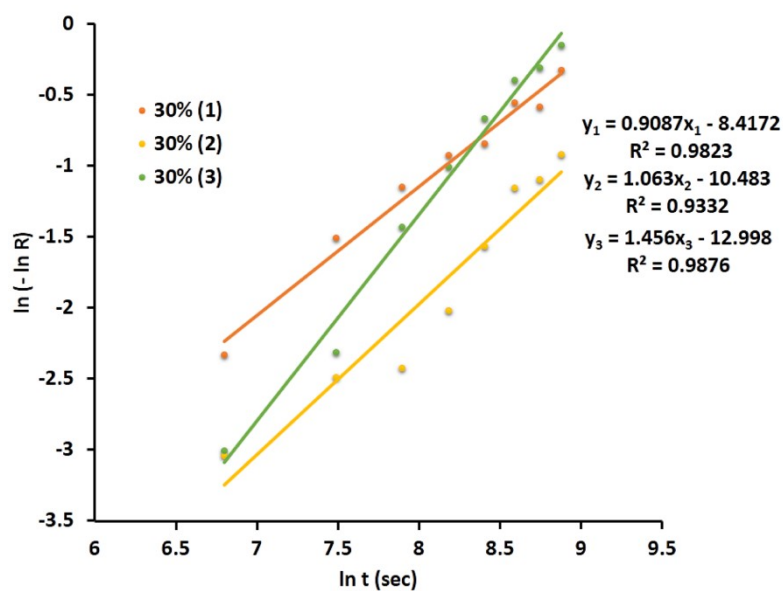

Fig. ESI 6 Avrami's kinetic model of LOs release out of microcapsules crosslinked with 30% of  $\text{CaCl}_2$

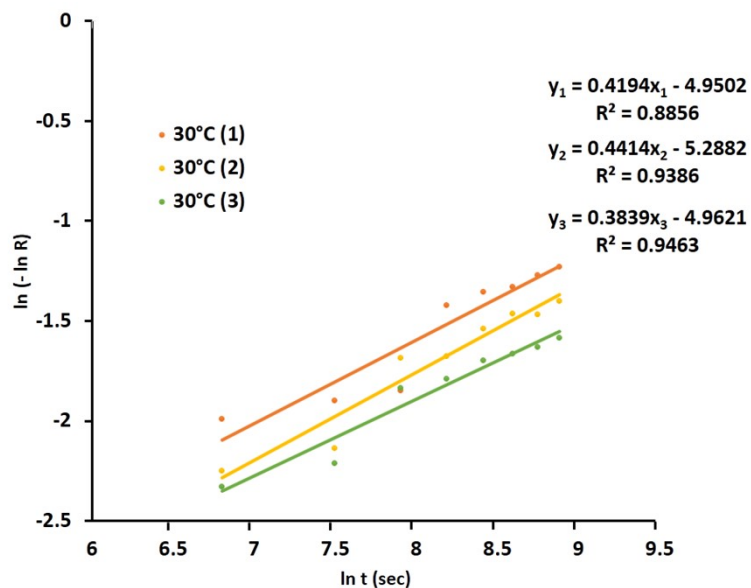

Fig. ESI 7 Avrami's kinetic model of LOs release out of microcapsules crosslinked with 15% of CaCl<sub>2</sub> at 30°C

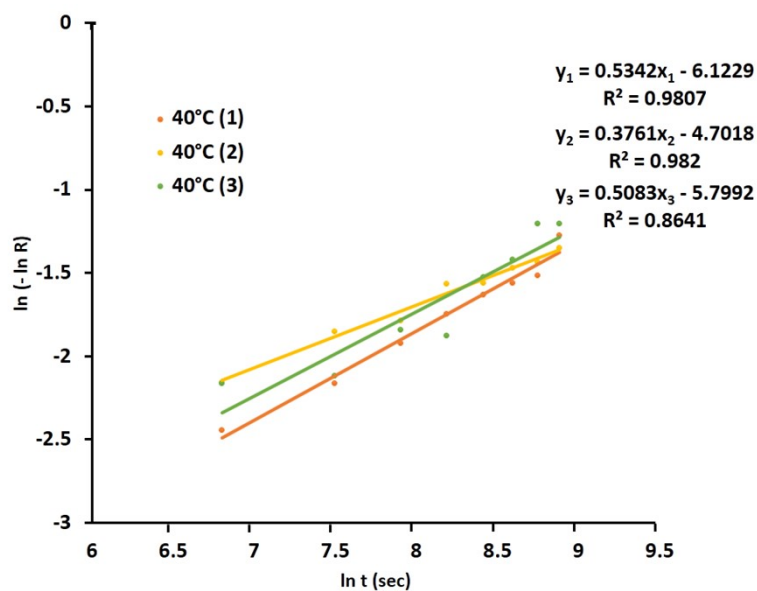

Fig. ESI 8 Avrami's kinetic model of LOs release out of microcapsules crosslinked with 15% of CaCl<sub>2</sub> at 40°C

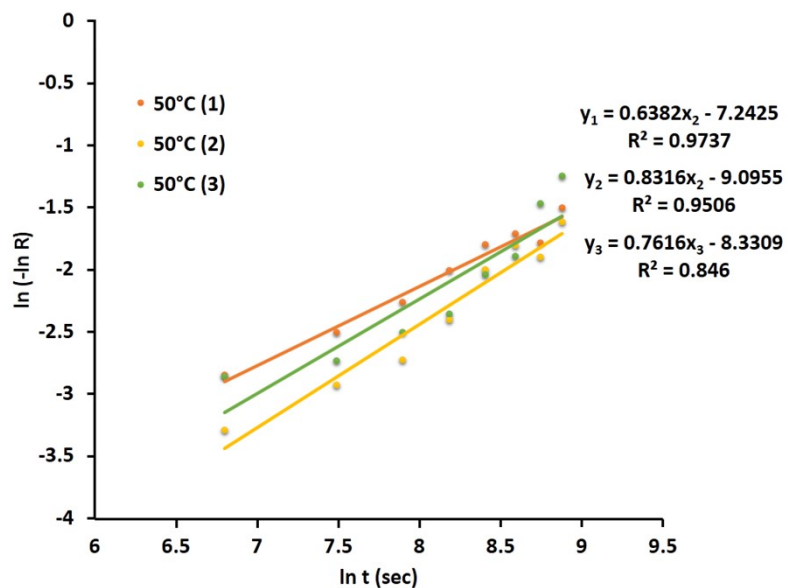

Fig. ESI 9 Avrami's kinetic model of LOs release out of microcapsules crosslinked with 15% of CaCl<sub>2</sub> at 50°C

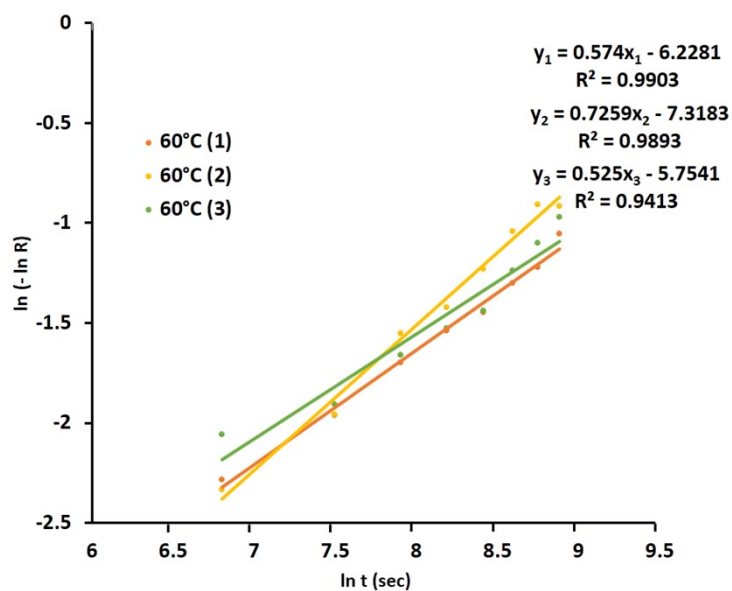

Fig. ESI 10 Avrami's kinetic model of LOs release out of microcapsules crosslinked with 15% of CaCl<sub>2</sub> at 60°C
